# Supplementary material
Source: PubMed Central journal article supplement (PMC4992648)
Supplement: NIHMS798245-supplement-1.pdf [file NIHMS798245-supplement-1.pdf]

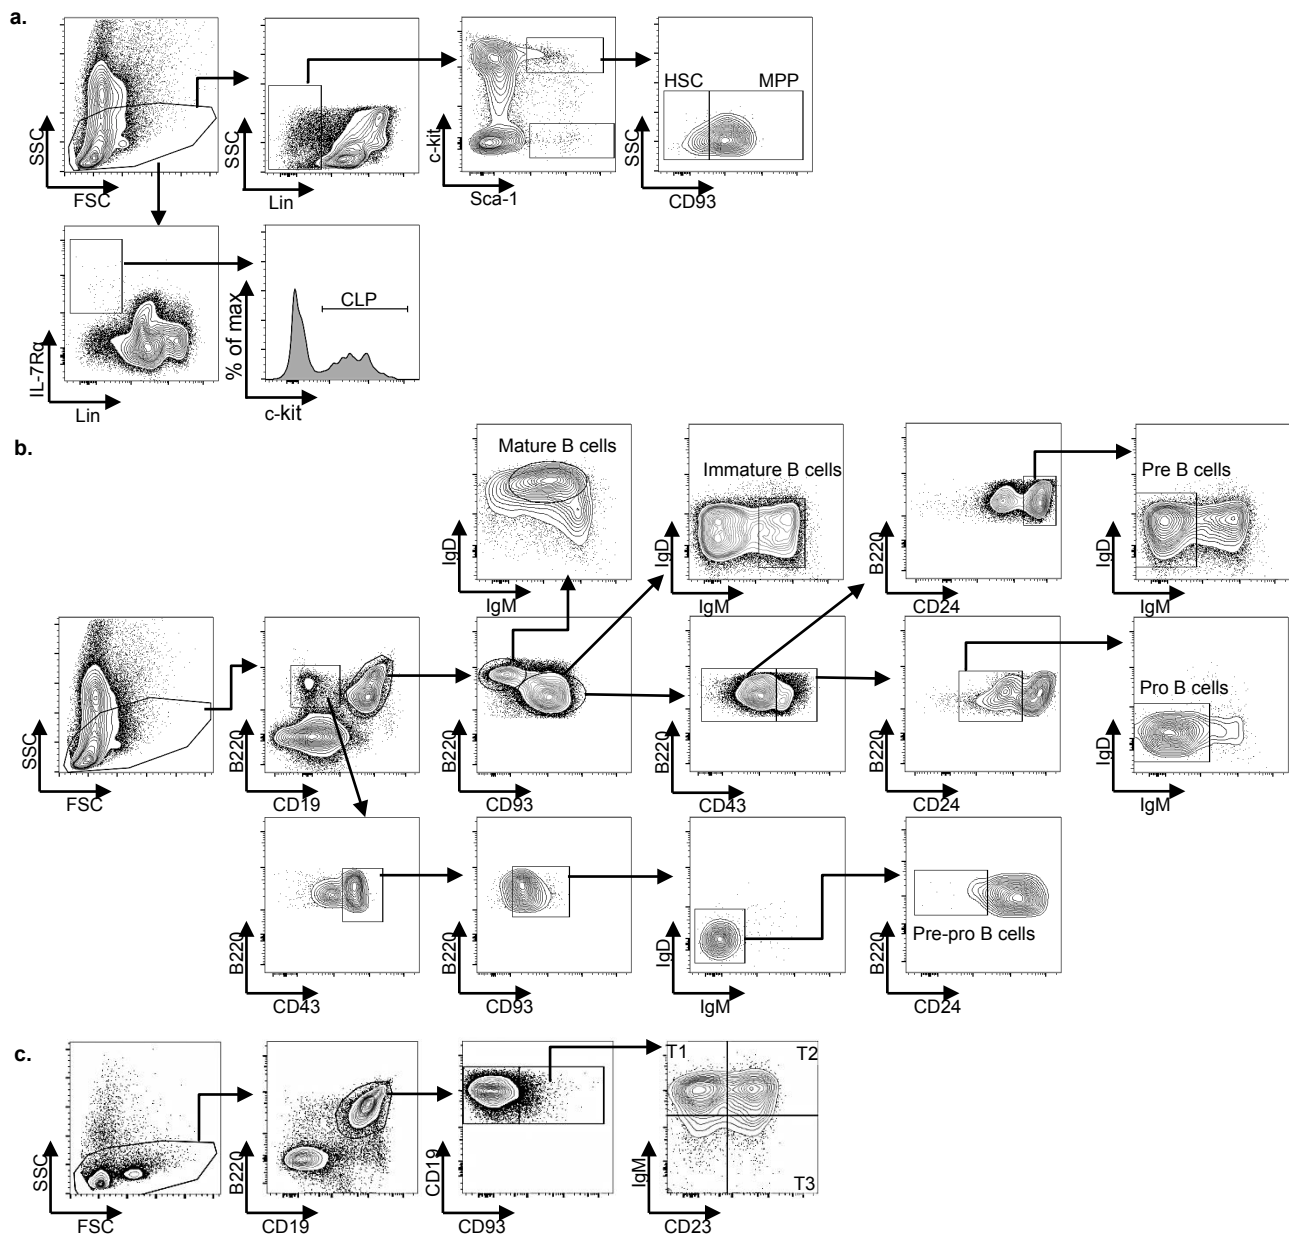

**Supplemental Figure 1. Gating strategies to identify progenitor cell and B cell precursor populations.**

**a.** Live bone marrow cells stained with Lin markers (CD3e, CD4, CD5, CD8, B220, NK1.1, CD11b, CD11c, Gr-1, and Ter-119), Sca-1, c-kit, CD93, IL-7R $\alpha$ ; lymphocytes were gated based on FSC-A and SSC-A. Lin<sup>-</sup> population was gated based on the FMO control. LSK-cells (Lin-Sca-1<sup>+</sup>c-kit<sup>+</sup>), HSCs (Lin-Sca-1<sup>+</sup>c-kit<sup>+</sup>CD93<sup>-</sup>), MPPs (Lin-Sca-1<sup>+</sup>c-kit<sup>+</sup>CD93<sup>+</sup>), and CLPs (Lin-Sca-1<sup>lo</sup>c-kit<sup>lo</sup>IL-7R $\alpha$ <sup>+</sup>) were selected based on the gating strategy shown. **b.** Live bone marrow cells were stained with Lin markers (CD3e, CD4, CD5, CD8, NK1.1, CD11b, CD11c, Gr-1, and Ter-119), CD19, B220, CD93, IgM, CD43, and CD24. Lymphocytes were gated based on characteristic FSC-A and SSC-A morphology. Gating strategy for selecting pre-pro B cells (Lin-B220<sup>+</sup>CD19<sup>-</sup>CD43<sup>+</sup>CD93<sup>+</sup>IgM<sup>-</sup>IgD<sup>-</sup>CD24<sup>+</sup>), pro-B cells (CD19<sup>+</sup>B220<sup>+</sup>CD93<sup>+</sup>CD43<sup>hi</sup>CD24<sup>int</sup>IgM<sup>-</sup>IgD<sup>-</sup>), pre-B cells (CD19<sup>+</sup>B220<sup>+</sup>CD93<sup>+</sup>CD43<sup>int</sup>CD24<sup>hi</sup>IgM<sup>-</sup>IgD<sup>-</sup>), immature B cells (CD19<sup>+</sup>B220<sup>+</sup>CD93<sup>+</sup>IgM<sup>+</sup>IgD<sup>-</sup>) and mature B cells (CD19<sup>+</sup>B220<sup>+</sup>CD93<sup>+</sup>IgM<sup>+</sup>IgD<sup>+</sup>) is shown. **c.** Lymphocytes in the spleen were gated based on FSC-A and SSC-A morphology. T1 B cells (CD19<sup>+</sup>B220<sup>+</sup>CD93<sup>+</sup>IgM<sup>+</sup>CD23<sup>-</sup>), T2 B cells (CD19<sup>+</sup>B220<sup>+</sup>CD93<sup>+</sup>IgM<sup>+</sup>CD23<sup>+</sup>), and T3 B cells (CD19<sup>+</sup>B220<sup>+</sup>CD93<sup>+</sup>IgM<sup>-</sup>CD23<sup>+</sup>) were gated as shown based on the indicated phenotypes.

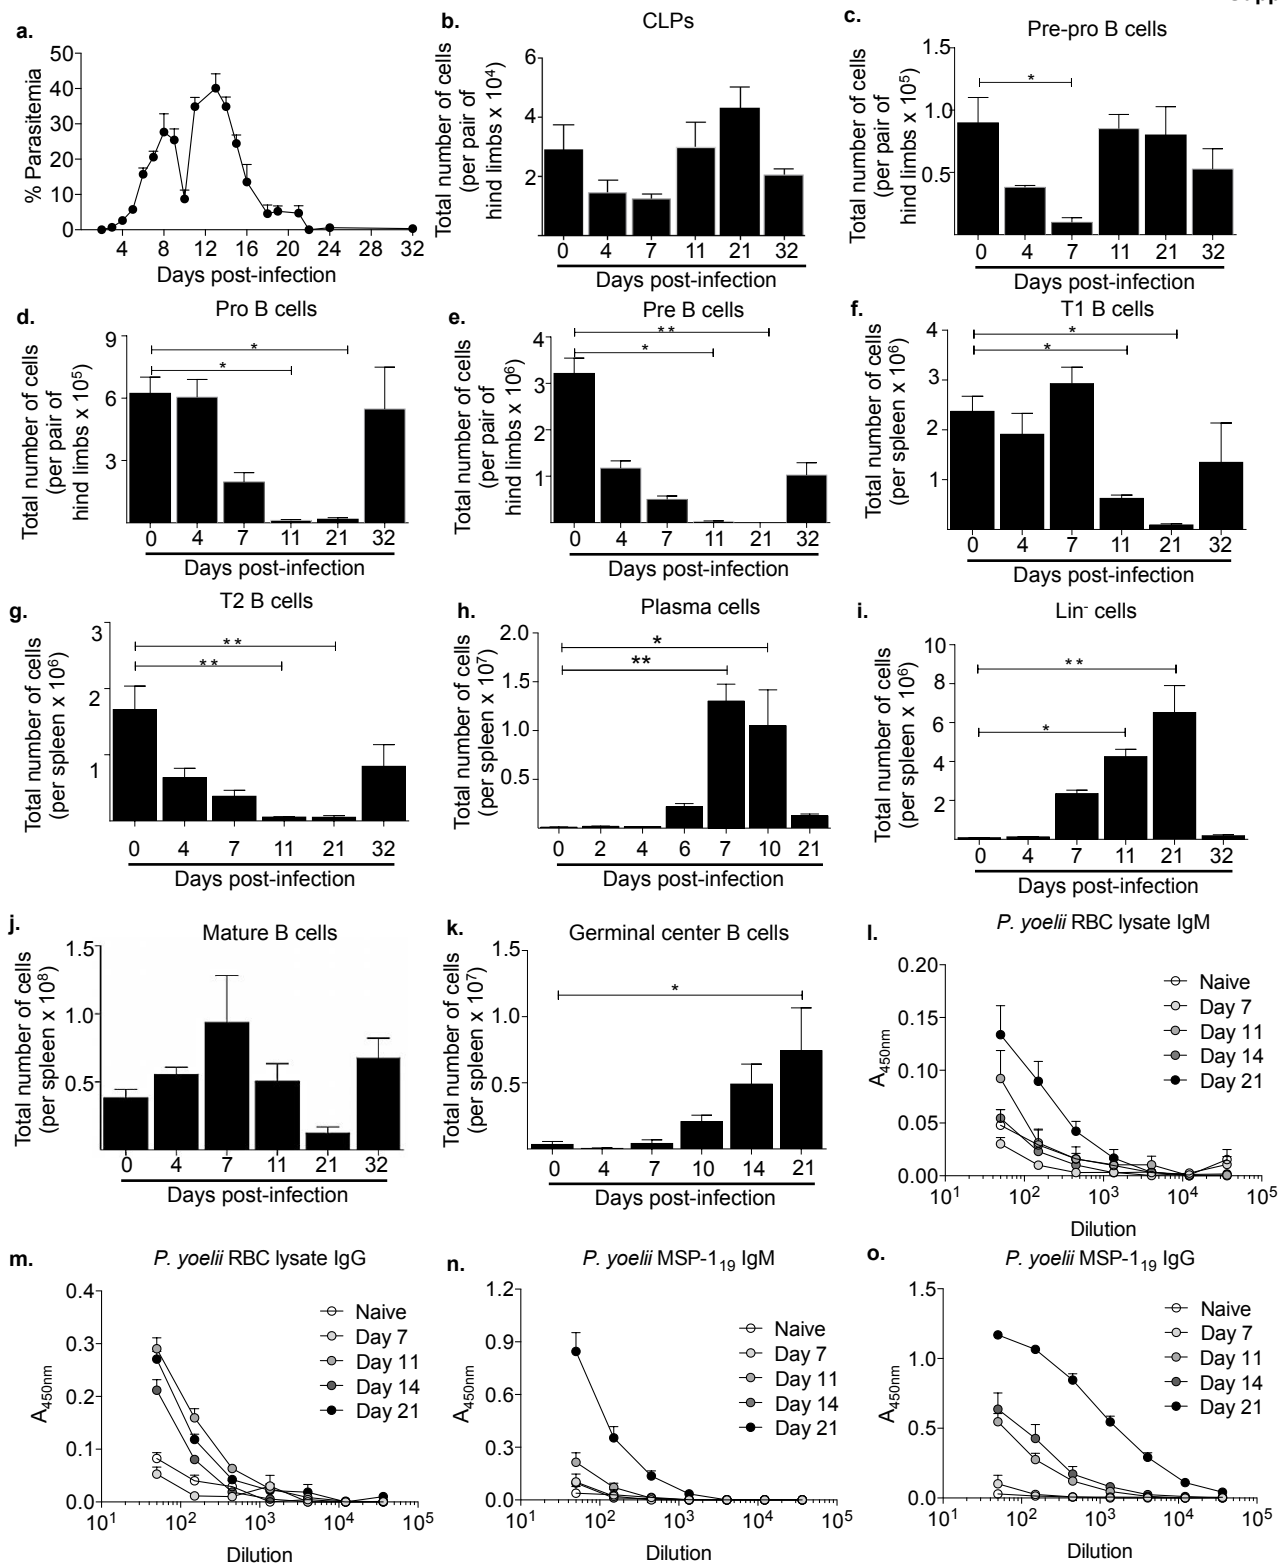

**Supplemental Figure 2. Effect of *Plasmodium yoelii* 17X infection on lymphoid progenitors and B-cell precursors in the bone marrow and spleen of C57BL/6 mice** a. Representative parasitemia curve following i.p. infection of  $10^5$  pRBC into WT C57BL/6 mice. Total number of b. CLPs, c. Pre-pro B cells, d. Pro B cells, and e. Pre B cells, from the bone marrow of naïve (day 0) or *P. yoelii* 17X infected mice based on the gating strategy shown in Supplemental Figure 1. Total number of splenic f. T1 B cells, g. T2 B cells, h. Plasma cells. i. Lineage negative (Lin<sup>-</sup>) cells, j. Mature B cells, and k. Germinal center B cells from naïve (day 0) or *P. yoelii* 17X infected mice based on the gating strategy shown in Supplemental Figure 1. Relative (l, m) *P. yoelii* 17X infected RBC lysate (n, o) or MSP-1<sub>19</sub>-specific antibody response as measured by ELISA at days 0, 7, 11, 14 and 21 p.i. Data are representative of two independent experiments, with n = 3-5 mice per group/ time point; Error bars (a-o) S.E.M.

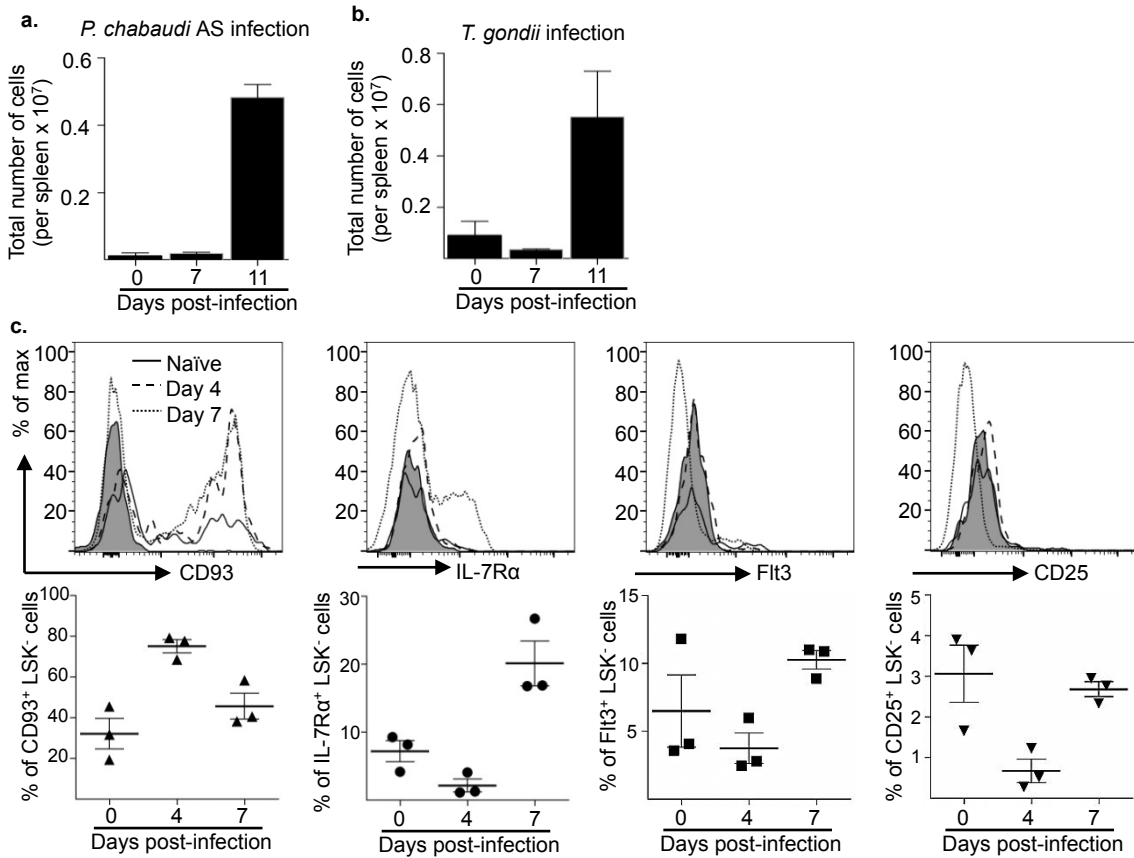

**Supplemental Figure 3. LSK<sup>-</sup> cell phenotype with different parasite infections.** Total number of LSK<sup>-</sup> cells in the spleen of naïve or C57BL/6 mice after days 7 and 11 of **a.** *Plasmodium chabaudi* AS infection or **b.** *Toxoplasma gondii* infection. **c.** Representative histogram plots and percentage of bone marrow derived LSK<sup>-</sup> cells showing expression of CD93 (triangle), IL-7R $\alpha$  (circle), Flt3 (square), and CD25 (inverted triangle) in naïve (solid line) and C57BL/6 mice after 4 (dashed line), and 7 (dotted line) days of *P. yoelii* 17X infection. The FMO (fluorescent minus one) controls are shown as grey filled histograms. Data are representative of two independent experiments (**c**), with  $n = 3-5$  mice per group/ time point; Error bars (**a-c**) S.E.M.

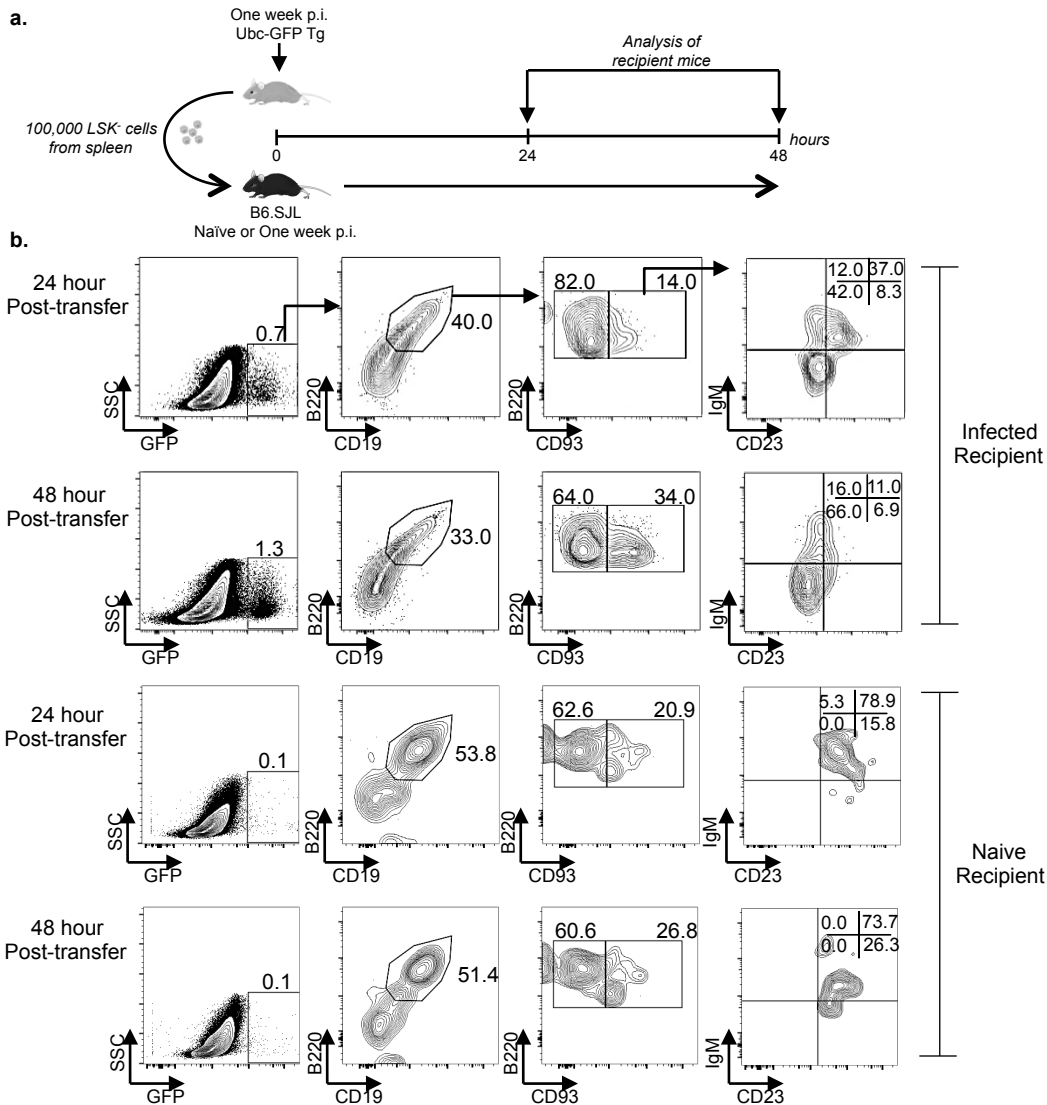

**Supplemental Figure 4. Splenic LSK<sup>-</sup> cells differentiate into B cells within 24 hours during *Plasmodium* infection.** **a.** LSK<sup>-</sup> cells were sorted from the spleen of Ubc-GFP Tg mice, one week post *P. yoelii* 17X infection, and 100,000 cells (GFP<sup>+</sup>CD45.2<sup>+</sup>) were transferred into naive congenic (CD45.1) mice or at the same stage of infection (day 7 p.i.). The spleens of recipient mice were harvested 24 and 48 hours post-transfer. **b.** The splenocytes were enriched for donor (CD45.2<sup>+</sup>) cells and fluorochrome conjugated antibodies were used to sub-analyze the donor (GFP<sup>+</sup>) cell population based on the gating strategy displayed.
